# Supplementary material for: Mechanistic insights into enhanced photocatalytic H2O2 production induced by a Z-scheme heterojunction of copper bismuth oxide and molybdenum sulfide
Source: Royal Society of Chemistry journal article supplement (doi:10.1039/d3ta02875e), 2023-01-01
Supplement: d3ta02875e1.pdf [file d3ta02875e1.pdf]

# Mechanistic insights into enhanced photocatalytic H<sub>2</sub>O<sub>2</sub> production induced by a Z-scheme heterojunction of copper bismuth oxide and molybdenum sulfide

Akshay Tikoo<sup>a</sup>, Nikitha Lohia<sup>a</sup>, Sri Surya Charan Kondeti<sup>a</sup>, Praveen Meduri<sup>a\*</sup>

<sup>a</sup> Department of Chemical Engineering, Indian Institute of Technology Hyderabad, Kandi, Sangareddy-502285, Telangana (India)

\* Corresponding Author

Email: [meduripraveen@che.iith.ac.in](mailto:meduripraveen@che.iith.ac.in), Tel: 040-23016214

## Supplementary Information

### 1. H<sub>2</sub>O<sub>2</sub> production using various photocatalysts

**Table S1.** H<sub>2</sub>O<sub>2</sub> yield using different photocatalysts and sacrificial agents.

| Photocatalyst                                          | Sacrificial reagent              | Concentration (mg ml <sup>-1</sup> ) | H <sub>2</sub> O <sub>2</sub> yield (μM h <sup>-1</sup> ) | Reference |
|--------------------------------------------------------|----------------------------------|--------------------------------------|-----------------------------------------------------------|-----------|
| Au-TiO <sub>2</sub>                                    | HCOOH                            | 1                                    | 700                                                       | [1]       |
| Co@TiO <sub>2</sub>                                    | CH <sub>3</sub> OH               | 1                                    | 1700                                                      | [2]       |
| CQDs@TiO <sub>2</sub>                                  | C <sub>2</sub> H <sub>5</sub> OH | 1.33                                 | 1140                                                      | [3]       |
| CoP/g-C <sub>3</sub> N <sub>4</sub>                    | C <sub>2</sub> H <sub>5</sub> OH | 1                                    | 70                                                        | [4]       |
| Nv- g-C <sub>3</sub> N <sub>4</sub>                    | C <sub>2</sub> H <sub>5</sub> OH | 1                                    | 880                                                       | [5]       |
| RGO/Cd <sub>3</sub> (TMT) <sub>2</sub>                 | CH <sub>3</sub> OH               | 4                                    | 292                                                       | [6]       |
| MIL-125-NH <sub>2</sub>                                | Benzylalcohol                    | 0.71                                 | 800                                                       | [7]       |
| Ov-Bi/Bi <sub>2</sub> O <sub>2-x</sub> CO <sub>3</sub> | C <sub>2</sub> H <sub>5</sub> OH | 4                                    | 400                                                       | [8]       |
| M-CdS                                                  | 2- propanol                      | 1                                    | 963                                                       | [9]       |

|                                                          |                    |     |     |      |
|----------------------------------------------------------|--------------------|-----|-----|------|
| Au-MoS <sub>2</sub>                                      | -----              | 1   | 132 | [10] |
| Fe <sub>2</sub> O <sub>3</sub> @C@1T/2H-MoS <sub>2</sub> | CH <sub>3</sub> OH | 0.2 | 315 | [11] |

## 2. Crystallite size calculation

Scherrer's equation used to calculate the crystalline size is as follows:

$$D = K\lambda/\beta\cos(\theta) \quad (i)$$

where K is a dimensionless shape factor = 0.9;

$\lambda$  is x-ray wavelength;

$\beta$  is the full width at half maximum of the peak under consideration;

$\theta$  is the diffraction angle of the peak under consideration.

## 3. d-spacing calculation

The interplanar distance is calculated using the following equation:

$$d = n\lambda/2\sin(\theta) \quad (ii)$$

where n is the order of diffraction;

$\lambda$  is the x-ray wavelength;

$\theta$  is the diffraction angle of the peak under consideration.

#### 4. Tauc Plot

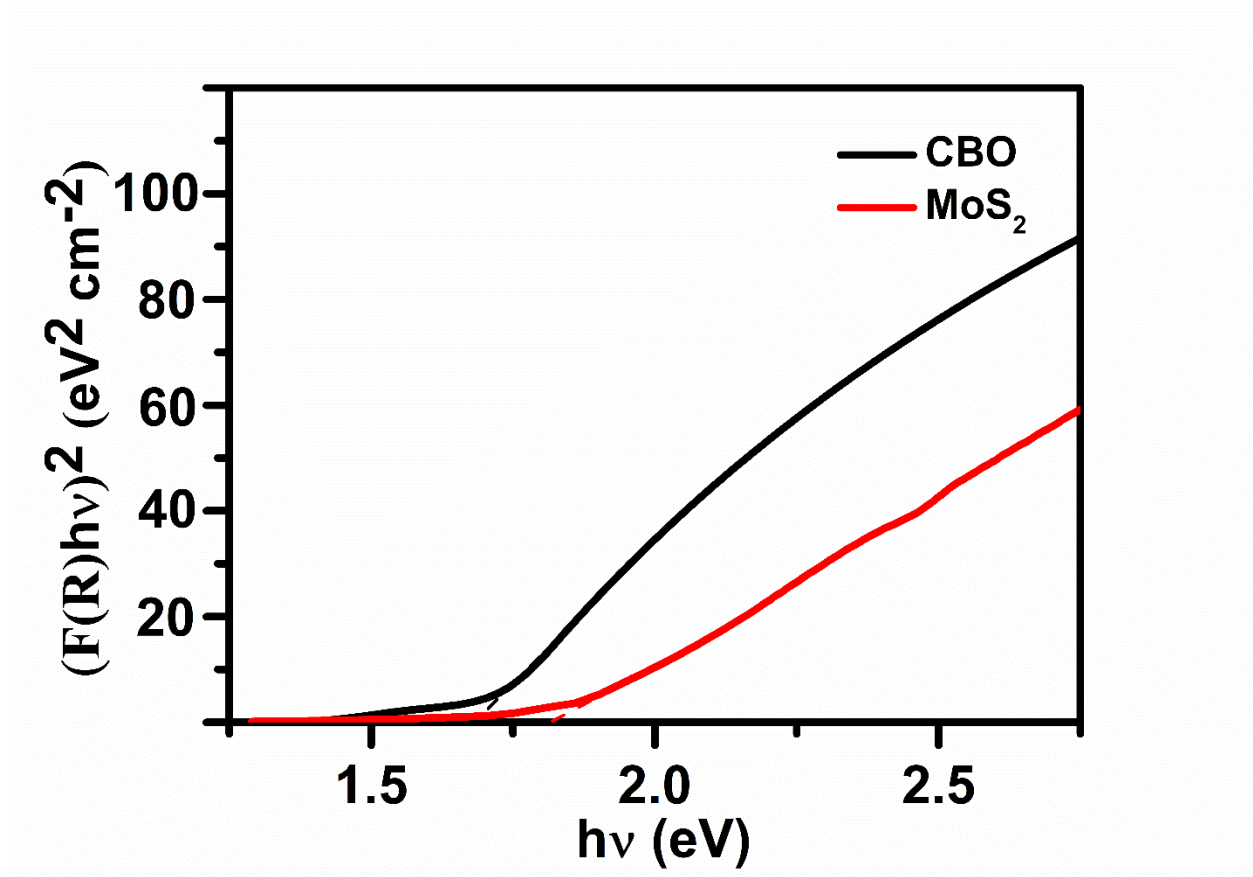

**Fig. S1.** Tauc plot of CBO and  $\text{MoS}_2$ .

Equation (iii) shows the relation between Kubelka-Munk function and band gap. The equation indicates that the intercept of the graph above is equal to the material band gap.

$$(F(R)hv)^2 = A(hv - E_g) \quad (\text{iii})$$

where  $F(R)$  is Kubelka-Munk function;

$h$  is the Planck's constant;

$v$  is the photons frequency;

$A$  is a constant that depends on the transition probability;

$E_g$  is the bandgap.

**Table S2.** Bandgap of CBO and MoS<sub>2</sub>.

| Sample       | CBO  | MoS <sub>2</sub> |
|--------------|------|------------------|
| Bandgap (eV) | 1.66 | 1.83             |
| CB (eV)      | -0.6 | 0.12             |
| VB(eV)       | 1.06 | 1.95             |

Valence band edge (VB) and conduction band edge (CB) of the materials are calculated using the following equations:

$$E_{VB} = \chi - E_e + 0.5E_g \quad (\text{iv})$$

$$E_{CB} = E_{VB} - E_g \quad (\text{v})$$

where  $\chi$  is the absolute electronegativity;

$E_e$  is the energy of free electron on the normal hydrogen scale (4.5 eV);

$E_g$  is the bandgap.

## 5. TRPL spectroscopy

TRPL is used to understand the charge recombination. Decay curves are fitted by Edinburgh instrument's fluoracle software based on the exponential equation:

$$y = A + B_1 \exp(-t_1/\tau_1) + B_2 \exp(-t_2/\tau_2) + B_3 \exp(-t_3/\tau_3) \quad (\text{vi})$$

Average lifetime is calculated as follows:

$$\langle\tau\rangle = (B_1\tau_1^2 + B_2\tau_2^2 + B_3\tau_3^2) / (B_1\tau_1 + B_2\tau_2 + B_3\tau_3) \quad (\text{vii})$$

Time constants are tabulated below in Table S1.

**Table S3.** TRPL parameters

| Sample               | $\tau_1$ (ns) | $\tau_2$ (ns) | $\tau_3$ (ns) | $\tau$ (ns) |
|----------------------|---------------|---------------|---------------|-------------|
| CBO                  | 1.58          | 1.12          | 3.88          | 1.60        |
| MoS <sub>2</sub>     | 2.79          | 1.44          | 8.81          | 2.85        |
| CBO@MoS <sub>2</sub> | 5.26          | 1.23          | 11.59         | 5.34        |

## 6. Electrochemical impedance spectroscopy (EIS)

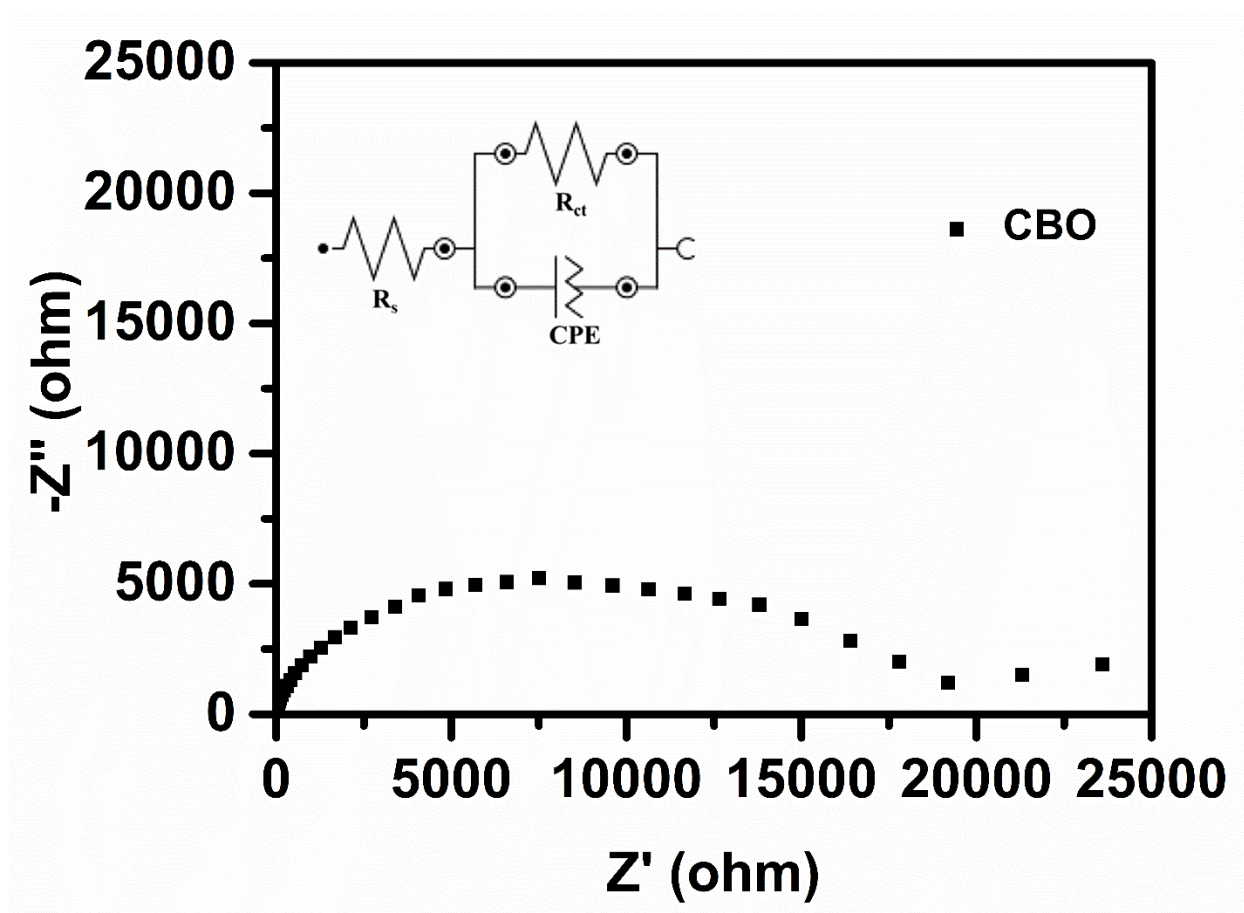

**Fig. S2.** EIS spectra of CBO.

**Table S4.** Fitted parameters for the circuit in Fig. S3

| Sample          | CBO  | MoS <sub>2</sub> | CBO@MoS <sub>2</sub> |
|-----------------|------|------------------|----------------------|
| $R_s$ (ohm)     | 34.8 | 31.7             | 33.4                 |
| $R_{ct}$ (kohm) | 20.6 | 5.9              | 3.8                  |

7. Absorption curves for  $\text{H}_2\text{O}_2$  production

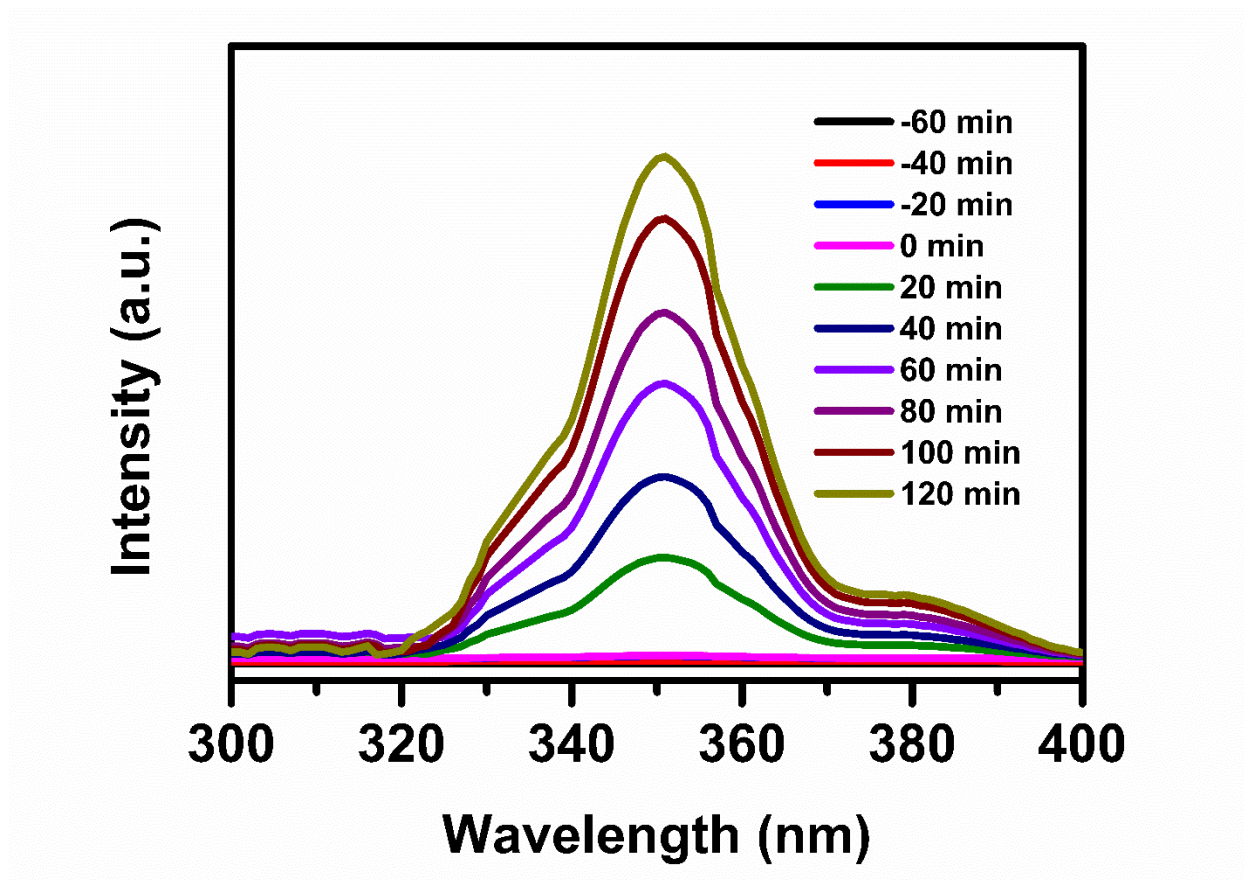

Fig. S3. Absorption curves for  $\text{H}_2\text{O}_2$  production using CBO@MoS<sub>2</sub>.

## 8. Material optimization

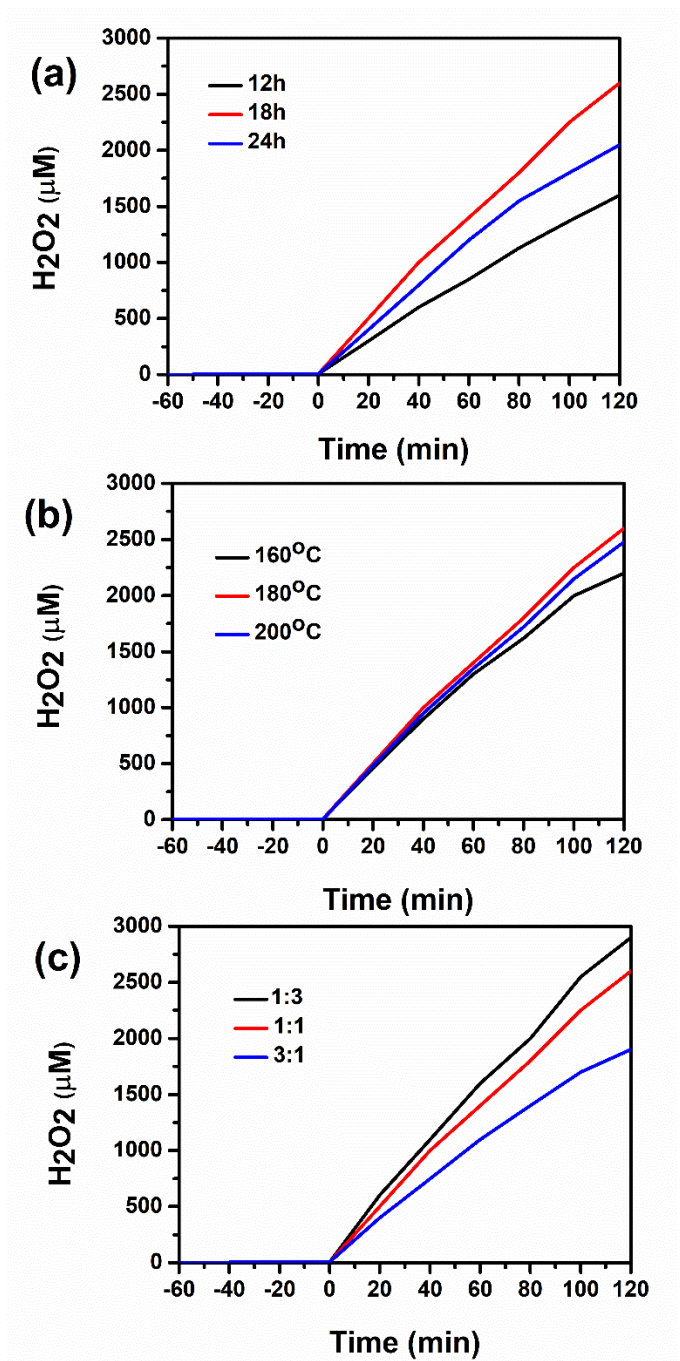

**Fig. S4.**  $\text{H}_2\text{O}_2$  production with: (a) time of reaction. (b) temperature of reaction. (c) Ratio of CBO and Mo precursor.

## 9. Kinetic modelling

**Table S5.** Rate constants and saturation concentration for H<sub>2</sub>O<sub>2</sub> production.

| Sample                                 | CBO   | MoS <sub>2</sub> | CBO@MoS <sub>2</sub> |
|----------------------------------------|-------|------------------|----------------------|
| K <sub>f</sub> (μM min <sup>-1</sup> ) | 1.4   | 4.2              | 29.8                 |
| k <sub>d</sub> (min <sup>-1</sup> )    | 0.011 | 0.0026           | 0.0036               |
| Saturation concentration (μM)          | 130   | 1562             | 8372                 |

**Table S6.** Rate constants and saturation concentration for H<sub>2</sub>O<sub>2</sub> production using CBO@MoS<sub>2</sub>.

| pH                                     | 3      | 5      | 7      | 9      | 11     |
|----------------------------------------|--------|--------|--------|--------|--------|
| K <sub>f</sub> (μM min <sup>-1</sup> ) | 37.2   | 31.7   | 29.8   | 26.5   | 23.1   |
| k <sub>d</sub> (min <sup>-1</sup> )    | 0.0028 | 0.0024 | 0.0036 | 0.0032 | 0.0033 |
| Saturation concentration (μM)          | 13214  | 13345  | 8372   | 8337   | 7100   |

#### 10. Solar to chemical conversion efficiency

**Table S7.** SCC efficiency.

| Sample         | CBO  | MoS <sub>2</sub> | CBO@MoS <sub>2</sub> |
|----------------|------|------------------|----------------------|
| Efficiency (%) | 0.02 | 0.7              | 0.37                 |

SCC is determined using the following formula:

$$\text{SCC} = \frac{n * \Delta G^o}{P * A * T} * 100\% \quad (\text{x})$$

where n is number of moles of H<sub>2</sub>O<sub>2</sub> produced;

$\Delta G^o$  is standard Gibbs free energy of the reaction;

P is power of light source;

A is illumination area;

T is time of reaction.

## 11. Scavenger effects

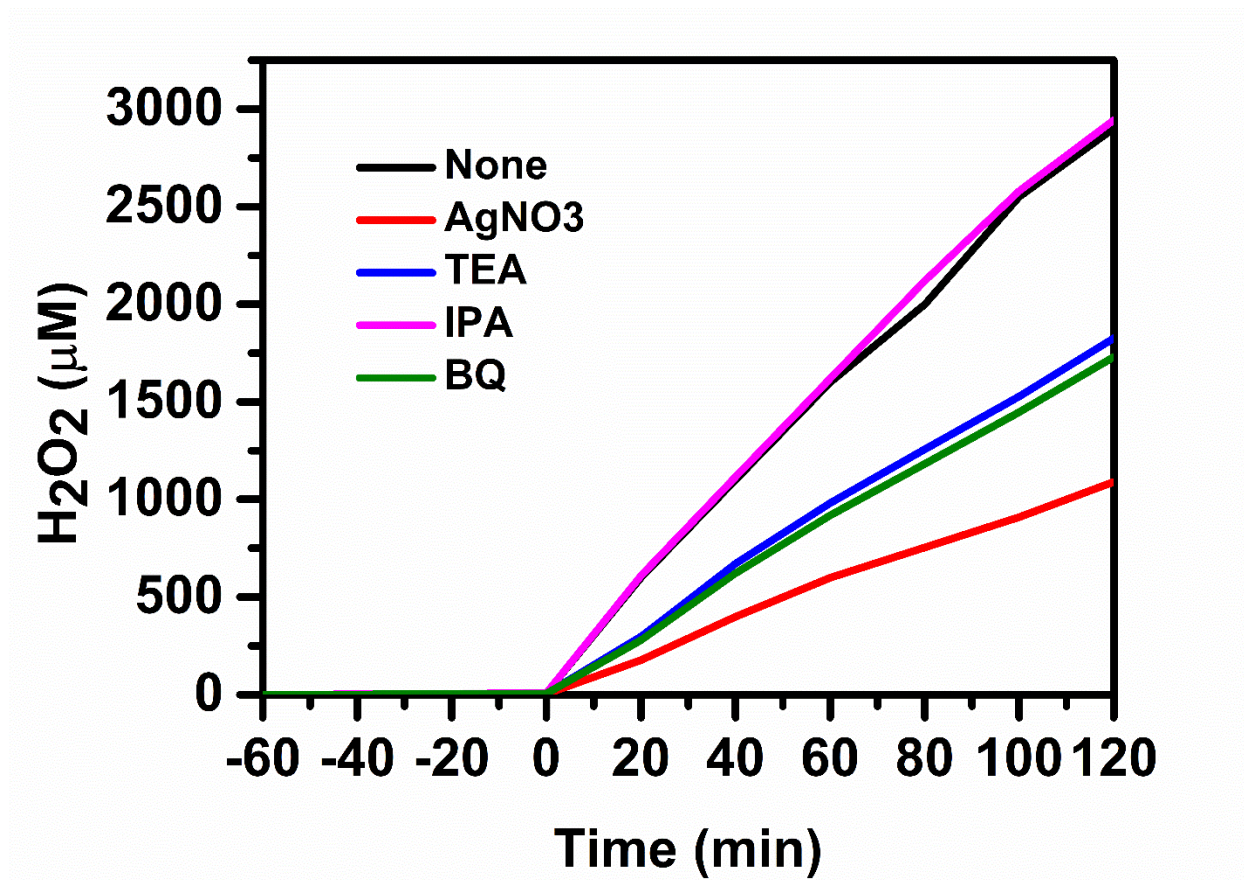

Fig. S5.  $\text{H}_2\text{O}_2$  production with addition of scavengers.

## 12. Absorbance curves of NBT

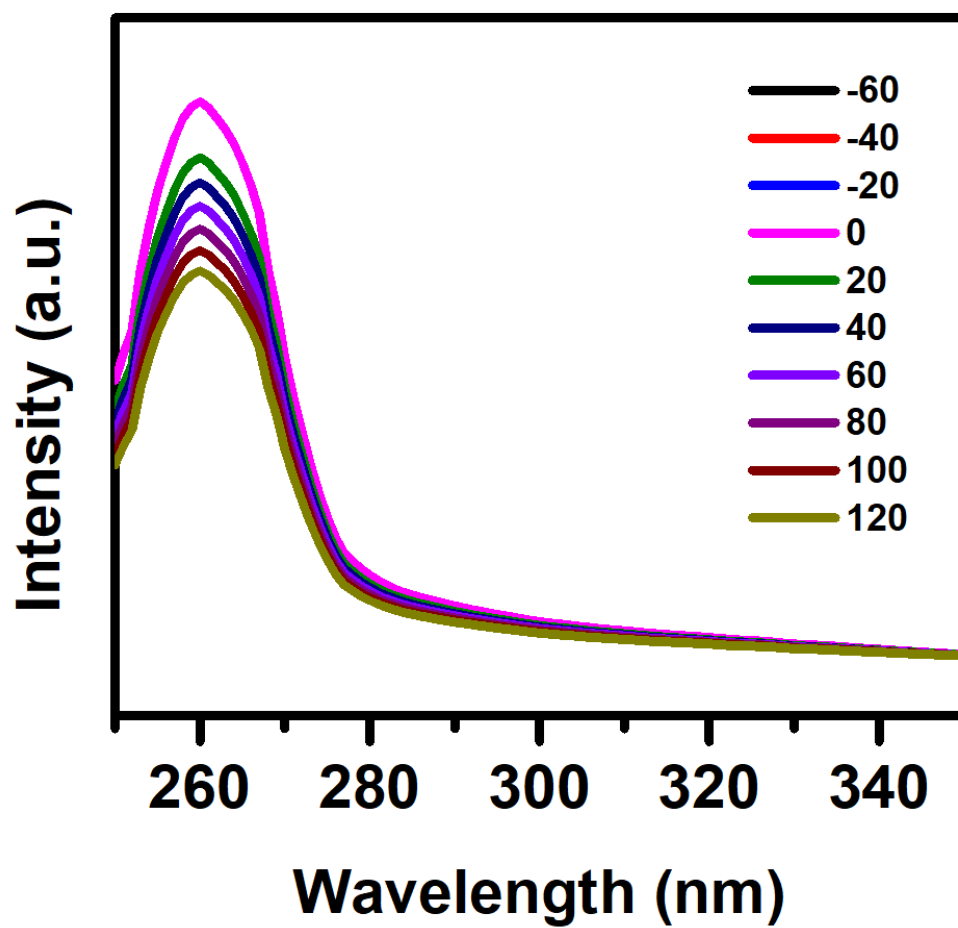

**Fig. S6.** Absorbance curves of NBT.

### 13. Mott Schottky calculations

Mott-Schottky equation is as follows:

$$\frac{1}{C^2} = \frac{2}{\epsilon\epsilon_0 A^2 e N_d} (V - V_{fb} - \frac{k_B T}{e})$$

where C is the capacitance;

$\epsilon$  is the dielectric constant;

$\epsilon_0$  is the permittivity of free space;

A is the surface area of electrode;

e is the elementary charge;

$N_d$  is the charge carrier density;

V is the applied potential;

$V_{fb}$  is the flat band potential;

$k_B$  is the Boltzmann constant;

T is the absolute temperature.

**Table S8.** Mott Schottky data.

| Sample               | $V_{fb}$ (V) | $N_d$    |
|----------------------|--------------|----------|
| CBO                  | 1.05         | 5.67E+17 |
| MoS <sub>2</sub>     | 0.12         | 4.33E+18 |
| CBO@MoS <sub>2</sub> | 1.04         | 2.52E+18 |

#### 14. Electron transfer number calculation

Koutecký–Levich (K-L) equation is used to calculate the electron transfer number (n):

$$\frac{1}{i} = \frac{1}{B\sqrt{\omega}} + \frac{1}{i_k} \quad (\text{viii})$$

$$B = 0.62 n F D_o^{\frac{2}{3}} \gamma^{\frac{-1}{6}} C_o \quad (\text{ix})$$

where  $i$  is measured current density;

$i_k$  is the kinetic current density;

$n$  is the electron transfer number;

$\omega$  is rotation speed ( $\text{rad s}^{-1}$ ):  $\omega = 2\pi N$ ,  $N$  is the linear rotation speed;

$F = 96485 \text{ C mol}^{-1}$ ;

$C_o$  is the concentration of  $\text{O}_2$  in bulk ( $C_o = 8.43 \times 10^{-7} \text{ mol cm}^{-3}$ ),

$D_o$  is the diffusion coefficient of  $\text{O}_2$  in the electrolyte at 298 K ( $D_o = 1.43 \times 10^{-5} \text{ cm}^2 \text{ s}^{-1}$ ),

$\gamma$  is the kinematic viscosity of the electrolyte ( $\gamma = 0.0112 \text{ cm}^2 \text{ s}^{-1}$ ).

**Table S9.** Electron transfer number at various potentials.

| Potential (V vs RHE) | 0.7  | 0.6  | 0.55 | 0.5  | 0.45 | 0.4  | 0.35 |
|----------------------|------|------|------|------|------|------|------|
| Transfer number      | 2.12 | 2.14 | 2.12 | 2.21 | 2.31 | 2.27 | 2.35 |

15. STH efficiency.

Half-cell solar to hydrogen (HC-STH) efficiency can be calculated using the equation below:

$$HC - STH (\%) = \frac{|J_{ph}| [V_{bias} - V_{H^+/H_2}]}{J_{in}} \times 100$$

where  $J_{ph}$  = photocurrent density ( $\text{mAcm}^{-2}$ ) at measured bias.

$V_{bias}$  = applied bias potential w.r.t RHE.

$V_{H^+/H_2}$  = standard potential for hydrogen evolution reaction i.e., 0 V vs RHE.

$J_{in}$  = power density of light illumination,  $100 \text{ mWcm}^{-2}$ .

16. MoS<sub>2</sub> OER

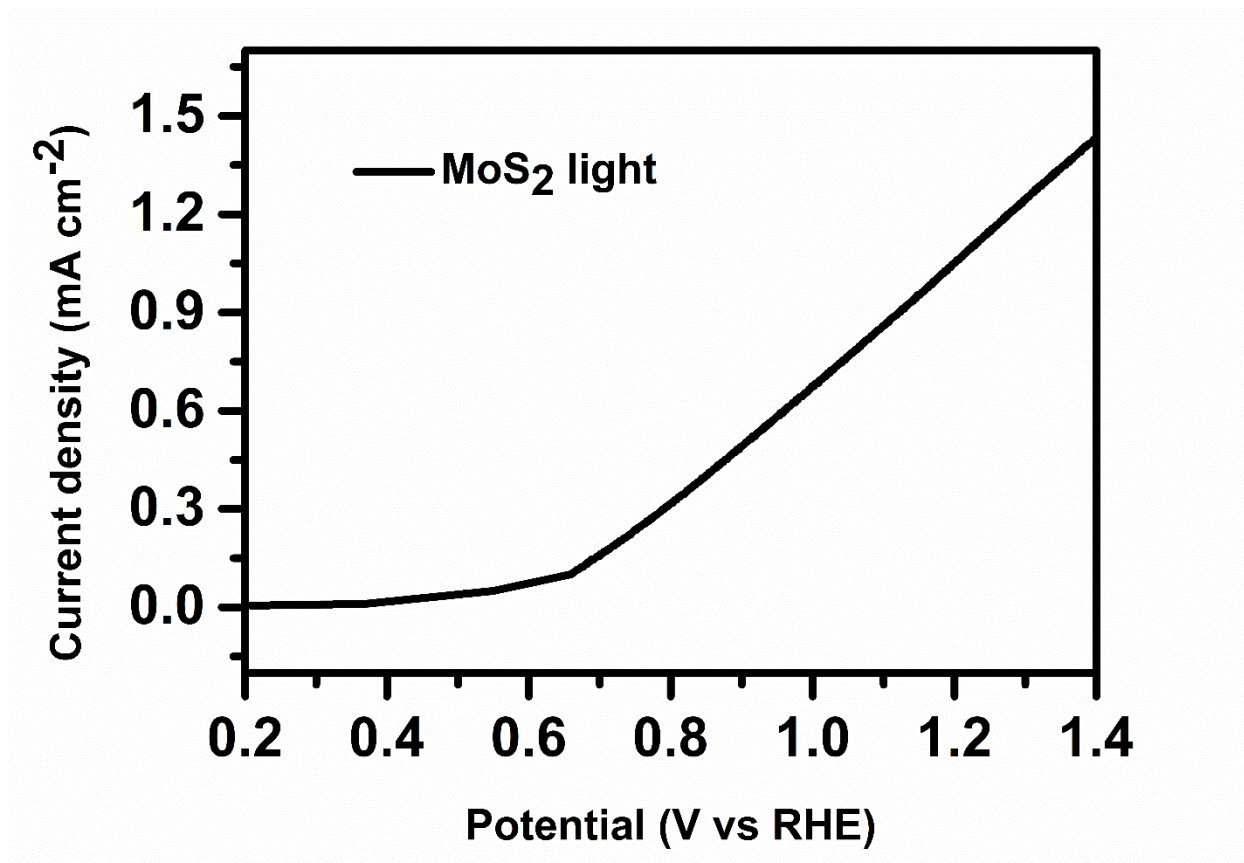

Fig. S7. LSV curve of MoS<sub>2</sub> for OER.

## 17. References:

- [1] Y. Shiraishi, S. Kanazawa, Y. Kofuji, H. Sakamoto, S. Ichikawa, S. Tanaka, T. Hirai, Sunlight-driven hydrogen peroxide production from water and molecular oxygen by metal-free photocatalysts, *Angew. Chem. Int. Ed. Engl.* 53 (2014) 13454–13459. <https://doi.org/10.1002/anie.201407938>.
- [2] T. Baran, S. Wojtyła, A. Minguzzi, S. Rondinini, A. Vertova, Achieving efficient H<sub>2</sub>O<sub>2</sub> production by a visible-light absorbing, highly stable photosensitized TiO<sub>2</sub>, *Appl. Catal. B Environ.* 244 (2019) 303–312. <https://doi.org/10.1016/j.apcatb.2018.11.044>.
- [3] R. Ma, L. Wang, H. Wang, Z. Liu, M. Xing, L. Zhu, X. Meng, F.-S. Xiao, Solid acids accelerate the photocatalytic hydrogen peroxide synthesis over a hybrid catalyst of titania nanotube with carbon dot, *Appl. Catal. B Environ.* 244 (2019) 594–603. <https://doi.org/10.1016/j.apcatb.2018.11.087>.
- [4] Y. Peng, L. Wang, Y. Liu, H. Chen, J. Lei, J. Zhang, Visible-Light-Driven Photocatalytic H<sub>2</sub>O<sub>2</sub> Production on g-C<sub>3</sub>N<sub>4</sub> Loaded with CoP as a Noble Metal Free Cocatalyst, *Eur. J. Inorg. Chem.* 2017 (2017) 4797–4802. <https://doi.org/10.1002/ejic.201700930>.
- [5] Preparation of N-vacancy-doped g-C<sub>3</sub>N<sub>4</sub> with outstanding photocatalytic H<sub>2</sub>O<sub>2</sub> production ability by dielectric barrier discharge plasma treatment, (n.d.). <https://www.cjcatal.com/EN/abstract/abstract22410.shtml> (accessed May 1, 2023).
- [6] J. Xu, Z. Chen, H. Zhang, G. Lin, H. Lin, X. Wang, J. Long, Cd<sub>3</sub>(C<sub>3</sub>N<sub>3</sub>S<sub>3</sub>)<sub>2</sub> coordination polymer/graphene nanoarchitectures for enhanced photocatalytic H<sub>2</sub>O<sub>2</sub> production under visible light, *Sci. Bull.* 62 (2017) 610–618. <https://doi.org/10.1016/j.scib.2017.04.013>.
- [7] Y. Isaka, Y. Kawase, Y. Kuwahara, K. Mori, H. Yamashita, Two-Phase System Utilizing Hydrophobic Metal–Organic Frameworks (MOFs) for Photocatalytic Synthesis of Hydrogen Peroxide, *Angew. Chem. Int. Ed.* 58 (2019) 5402–5406. <https://doi.org/10.1002/anie.201901961>.
- [8] Y. Lu, Y. Huang, Y. Zhang, T. Huang, H. Li, J. Cao, W. Ho, Effects of H<sub>2</sub>O<sub>2</sub> generation over visible light-responsive Bi/Bi<sub>2</sub>O<sub>3</sub>–xCO<sub>3</sub> nanosheets on their photocatalytic NO<sub>x</sub> removal performance, *Chem. Eng. J.* 363 (2019) 374–382. <https://doi.org/10.1016/j.cej.2019.01.172>.
- [9] J.H. Lee, H. Cho, S.O. Park, J.M. Hwang, Y. Hong, P. Sharma, W.C. Jeon, Y. Cho, C. Yang, S.K. Kwak, H.R. Moon, J.-W. Jang, High performance H<sub>2</sub>O<sub>2</sub> production achieved by sulfur-doped carbon on CdS photocatalyst via inhibiting reverse H<sub>2</sub>O<sub>2</sub> decomposition, *Appl. Catal. B Environ.* 284 (2021) 119690. <https://doi.org/10.1016/j.apcatb.2020.119690>.
- [10] H. Song, L. Wei, L. Chen, H. Zhang, J. Su, Photocatalytic Production of Hydrogen Peroxide over Modified Semiconductor Materials: A Minireview, *Top. Catal.* 63 (2020) 895–912. <https://doi.org/10.1007/s11244-020-01317-9>.
- [11] Y. Yang, Q. Wang, X. Zhang, X. Deng, Y. Guan, M. Wu, L. Liu, J. Wu, T. Yao, Y. Yin, Photocatalytic generation of H<sub>2</sub>O<sub>2</sub> over a Z-scheme Fe<sub>2</sub>O<sub>3</sub>@C@1T/2H-MoS<sub>2</sub> heterostructured catalyst for high-performance Fenton reaction, *J. Mater. Chem. A* 11 (2023) 1991–2001. <https://doi.org/10.1039/D2TA08145H>.
